# Supplementary material for: Visual outcomes after bilateral implantation of a new diffractive multifocal IOL: Preliminary results
Source: Research Square preprint supplement (doi:10.21203/rs.3.rs-1668619/v1), 2022-06-06
Supplement: Supplementary file 1 [file 86c4d5841b93292cc6d6d1db.docx]

| Table 1: Relative power vector values M, J0 and J45 and ocular outcomes after IOL implantation. (Mean ± SD) | | | | |
| --- | --- | --- | --- | --- |
|
|
|  |  | Right eyes |  | Left eyes |
|  |  |  |  |  |
| M (D) |  | -0.50 ± 0.48 |  | -0.37 ± 0.35 |
|  |  |  |  |  |
| J0 (D) |  | -0.12 ± 0.21 |  | -0.06 ± 0.18 |
|  |  |  |  |  |
| J45 (D) |  | -0.03 ± 0.19 |  | -0.00 ± 0.17 |
|  |  |  |  |  |
| K1 (D) |  | 43.3 ± 0.13 |  | 43.52 ± 1.58 |
|  |  |  |  |  |
| K2 (D) |  | 44.08 ± 1.53 |  | 44.27 ± 1.60 |
|  |  |  |  |  |
| Axial Lenght (mm) |  | 23.20 ± 0.84 |  | 23.15 ± 0.89 |
|  |  |  |  |  |
| Photopic pupil (mm) |  | 3.22 ± 0.77 |  | 3.09 ± 0.48 |
|  |  |  |  |  |
| Mesopic pupil (mm) |  | 4.46 ± 0.71 |  | 4.32 ± 0.63 |
| K1:flatter keratometry value. K2:steeper keratometry value | | | |  |
