# Supplementary material for: Visual outcomes after bilateral implantation of a new diffractive multifocal IOL: Preliminary results
Source: Research Square preprint supplement (doi:10.21203/rs.3.rs-1668619/v1), 2022-06-06
Supplement: Supplementary file 2 [file cc3abed62a469ba99ff966c0.docx]

| Table 2: logMAR far, intermediate and near visual acuity after IOL implantation (Mean ± SD). | | | |
| --- | --- | --- | --- |
|
|
|  |  |  |  |
| UDVA Right eyes |  | 0.19 ± 0.13 |  |
|  |  |  |  |
| UDVA Left eyes |  | 0.12 ± 0.11 |  |
|  |  |  |  |
| Binocular UDVA |  | 0.07 ± 0.09 |  |
|  |  |  |  |
| CDVA Right eyes |  | 0.07 ± 0.08 |  |
|  |  |  |  |
| CDVA Left eyes |  | 0.04 ± 0.06 |  |
|  |  |  |  |
| Binocular CDVA |  | -0.01 ± 0.04 |  |
|  |  |  |  |
| Binocular DCIVA |  | 0.08 ± 0.05 |  |
|  |  |  |  |
| Binocular DCNVA | | 0.12 ± 0.06 |  |
| UDVA: uncorrected distance visual acuity. CDVA: Corrected distance visual acuity. DCIVA: Distance-corrected intermediate visual acuity. DCNVA: Distance-corrected near visual acuity. | | |  |
|  |
|  |
|  |
